# Supplementary material
Source: Springer Nature journal article supplement (https://www.springermedizin.de/resource/supplementary/13054_2013_1893_MOESM5_ESM.pdf/9711794)

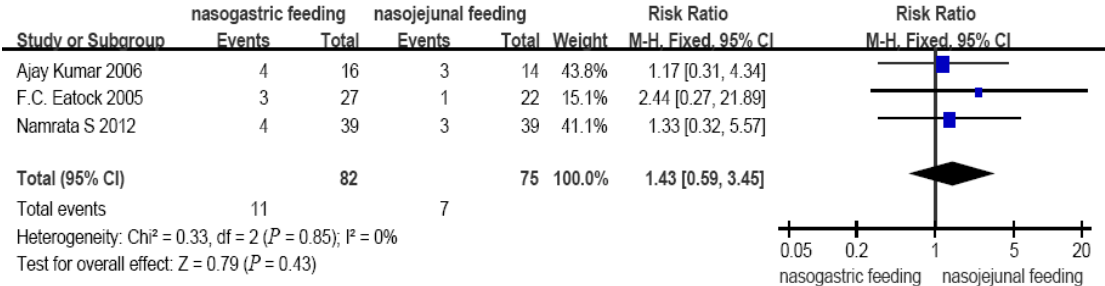

Supplement: MOESM5 [file 9711794]
